pattern was noted, that is, the fraction of CO<sub>2</sub> inspired decreased as V<sub>I</sub>/T<sub>I</sub> increased.

The purpose of our paper was to demonstrate that anesthesiologists have two agents available that result in significantly different breathing patterns. The clinician is interested in only two facts when selecting an appropriate  $\dot{V}_F$ : 1) Can rebreathing be eliminated by choosing an agent which results in a favourable waveform?; and 2) Does the prevention of rebreathing with this waveform result in less CO<sub>2</sub> retention at comparable levels of anesthesia? Our study shows that the waveform during enflurane anesthesia (low V<sub>I</sub>/T<sub>I</sub> and long end-expiratory pause) reduces rebreathing when compared to the sine wave pattern with halothane at any  $\dot{V}_F$ . The prevention of rebreathing with enflurane, however, does not reduce arterial CO<sub>2</sub> tension, because it is a more potent primary respiratory depressant, and no circuit can compensate for hypoventilation.

Waveform, then, cannot be separated for analysis in a clinical study from  $\dot{V}_E$  as Dr. Keenan would like because these two terms are interdependent. This interdependence is recognized by the clinician who can neither control nor select the waveform or  $\dot{V}_E$  which is present during spontaneous respiration in anesthetized subjects. The levels of  $\dot{V}_E$  in our study with enflurane and halothane are not significantly different from those reported by Spoerel *et al.*<sup>3</sup> The fact is, the clinician's choice of agent largely determines the waveform (including  $\dot{V}_E$ ), and this is a prime determination of rebreathing as we have shown.

In concluding that our "paper implies that the Bain circuit is unpredictable in its performance", Dr. Keenan has misinterpreted the results. This circuit is extremely predictable! Every patient breathing halo-

thane at a  $\dot{V}_F$  of 100 ml·kg<sup>-1</sup>·min<sup>-1</sup> rebreathed CO<sub>2</sub>. It is the patient's response to this inspired CO<sub>2</sub> load which is unpredictable during halothane anesthesia. In two other studies<sup>4,5</sup> using the same technique, we have demonstrated a significant increase in CO<sub>2</sub> tension in some patients who could not compensate for this inspired CO<sub>2</sub> load during halothane anesthesia. This increase in P<sub>CO<sub>2</sub></sub> was preventable, by either increasing  $\dot{V}_F$ ,<sup>5</sup> or by using another breathing system.<sup>4</sup>

We thank Dr. Keenan for his interest in the paper and we hope this clarifies his interpretation of the data.

ROBERT J. BYRICK, M.D. F.R.C.P.(C.)  
*Assistant Professor*  
*Department of Anesthesia*  
*St. Michaels Hospital*  
*University of Toronto*  
*Toronto, Ontario*

#### REFERENCES

1. Byrick RJ, Janssen EG: Respiratory waveform and rebreathing in T-piece circuits: A comparison of enflurane and halothane waveforms. *ANESTHESIOLOGY* 53:371-378, 1980
2. Milic-Emili J, Grunstein MM: Drive and timing components of ventilation. *Chest* 70(Suppl):131-133, 1976
3. Spoerel WE, Aitken RR, Bain JA: Spontaneous respiration with the Bain breathing circuit. *Can Anaesth Soc J* 25:30-35, 1978
4. Byrick RJ, Janssen EG, Yamashita M: Rebreathing and coaxial circuits: A comparison of the Bain and Mera F. *Can Anaesth Soc J*, 28:321-328, 1981
5. Byrick RJ: Respiratory compensation during spontaneous ventilation with the Bain circuit. *Can Anaesth Soc J* 27:96-105, 1980

(Accepted for publication January 13, 1981.)

Anesthesiology  
55:86-87, 1981

### Hypothermia after Cardiopulmonary Bypass in Man

*To the Editor:*—We read with interest the article by Noback and Tinker<sup>1</sup> concerning the amelioration of hypothermia after cardiopulmonary bypass with nitroprusside-induced vasodilation. They concluded that the decrease in post-bypass nasopharyngeal temperature could be minimized by the simple procedure of using nitroprusside and increased pump flows during the rewarming period. Although their data show that the group of patients treated with nitroprusside had a smaller decrease (1.5° C vs. 2.5° C) in naso-

pharyngeal temperature than the control group upon termination of bypass, the fact remains that the nitroprusside-treated group did experience a decrease in nasopharyngeal temperature.

We have solved the problem of hypothermia after cardiopulmonary bypass by heating and humidifying the inspired gas. In our system the inspiratory gas is passed through a Bennett Cascade humidifier located between the carbon dioxide absorber and the Y-piece. The temperature of the inspired gas is controlled with

FIG. 1. Nasopharyngeal temperature vs. time after cardiopulmonary bypass.

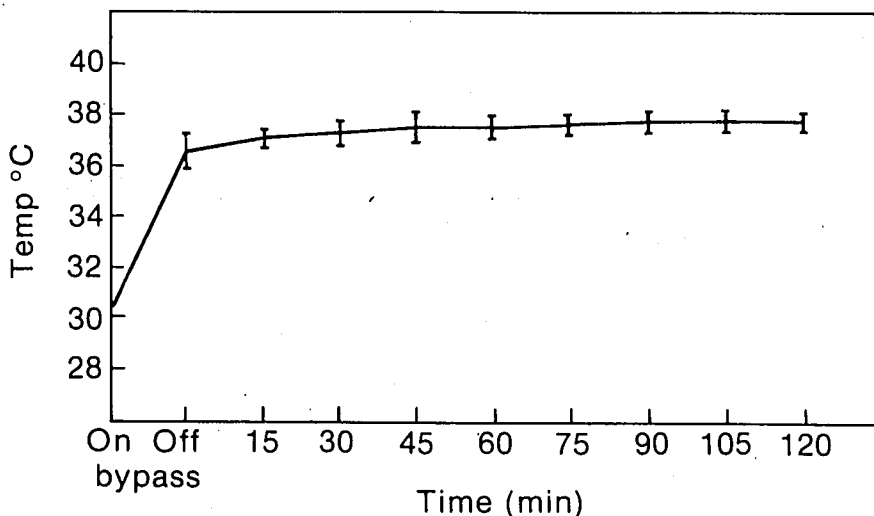

the thermostat on the humidifier and monitored with a thermometer at the Y-piece. The temperature of the inspired gas is typically maintained at 46–47° C. We followed the nasopharyngeal temperatures of five typical patients in the post-bypass period who underwent coronary artery bypass grafting. A plot of nasopharyngeal temperature vs. time after bypass is presented in figure 1. In contrast to Noback and Tinker's patients, the nasopharyngeal temperature in our patients remained stable in the post-bypass period and showed a small (1° C) increase over the two-hour period studied. Postoperatively, the patients remained warm in the ICU with good capillary refill and normal temperatures.

We believe that the use of heated humidification of the inspired gas is superior to the use of nitroprusside-induced vasodilation in the prevention of post-bypass hypothermia for the following reasons: 1) the technique is simple and doesn't require the prepa-

ration or administration of drugs with potential toxic effects; 2) the patient is not exposed to the effects of increased pump flows for extended periods during the rewarming period; and 3) the technique is a safe and effective way to prevent hypothermia in the post-bypass period.

C. CALDWELL, M.D.  
R. CRAWFORD, M.D.  
I. SINCLAIR, M.D.

*Department of Anesthesia  
Virginia Mason Hospital  
Seattle, Washington 98101*

#### REFERENCES

1. Noback C, Tinker J: Hypothermia after cardiopulmonary bypass in man. *ANESTHESIOLOGY* 53:277–280, 1980

*(Accepted for publication January 13, 1981.)*

### Drug Packaging Invites Confusion

*To the Editor:*—We would like to bring to the attention of the anesthesia community a potential drug packaging problem.

Abbott Laboratories' 0.5 per cent bupivacaine and 7.5 per cent sodium bicarbonate (figs. 1 and 2) are now available in identical cartons and similar and almost

identical syringes (except for labels). The main distinguishing feature is the color of the package which may not be recognized by those with certain types of color blindness.

As there have already been two incidences of therapeutic misadventure in our area, because of the con-
